# Supplementary material for: Neuroticism and Non-Suicidal Self-Injury: A Serial Mediation Model of Sleep Disturbance and Cortisol Dysregulation
Source: Research Square preprint supplement (doi:10.21203/rs.3.rs-8733092/v1), 2026-02-16
Supplement: Supplementary file 1 [file 052a5f334a0ec7dce21a010b.docx]

| **Table 5** Bootstrap Analysis of the DCS Mediation Model (Model 2) | | | | | |
| --- | --- | --- | --- | --- | --- |
|  | **Indirect effect value** | **Boot SE** | **Boot LLCI** | **Boot UICI** | **Effect size** |
| Total indirect effect | 0.0051 | 0.0013 | 0.0028 | 0.008 | 11.02% |
| Lnd1: Neuroticism→PSQI→NSSI | 0.0024 | 0.0009 | 0.0008 | 0.0043 | 5.18% |
| Lnd2: Neuroticism→DSC→NSSI | 0.0021 | 0.001 | 0.0005 | 0.0044 | 4.54% |
| Lnd3: Neuroticism→PSQI→DSC→NSSI | 0.0007 | 0.0003 | 0.0002 | 0.0014 | 1.51% |
| *Note: NSSI = Non-Suicidal Self-Injury; PSQI = Pittsburgh Sleep Quality Index; DCS=diurnal cortisol slope* | | | | | |
