# Supplementary material for: Neuroticism and Non-Suicidal Self-Injury: A Serial Mediation Model of Sleep Disturbance and Cortisol Dysregulation
Source: Research Square preprint supplement (doi:10.21203/rs.3.rs-8733092/v1), 2026-02-16
Supplement: Supplementary file 2 [file 1e8969cd515af20c497c8de9.docx]

| **Table 4** Bootstrap Analysis of the CAR Mediation Model (Model 1) | | | | | |
| --- | --- | --- | --- | --- | --- |
|  | **Indirect effect value** | **Boot SE** | **Boot LLCI** | **Boot UICI** | **Effect size** |
| Total indirect effect | 0.004 | 0.0012 | 0.0019 | 0.0065 | 8.64% |
| Lnd1: Neuroticism→PSQI→NSSI | 0.0022 | 0.0008 | 0.0008 | 0.0041 | 4.75% |
| Lnd2: Neuroticism→CAR→NSSI | 0.0009 | 0.0006 | -0.0001 | 0.0024 | 1.94% |
| Lnd3: Neuroticism→PSQI→CAR→NSSI | 0.0008 | 0.0004 | 0.0002 | 0.0016 | 1.73% |
| *Note: NSSI = Non-Suicidal Self-Injury; PSQI = Pittsburgh Sleep Quality Index; DCS=diurnal cortisol slope; CAR = Cortisol Awakening Respons* | | | | | |
