# Supplementary material for: Neuroticism and Non-Suicidal Self-Injury: A Serial Mediation Model of Sleep Disturbance and Cortisol Dysregulation
Source: Research Square preprint supplement (doi:10.21203/rs.3.rs-8733092/v1), 2026-02-16
Supplement: Supplementary file 3 [file d1933cc524d7ad47e311518a.docx]

| **Table 3** Regression Analyses of the DCS Mediation Model (Model 2) | | | | | | | | | | | | | | |
| --- | --- | --- | --- | --- | --- | --- | --- | --- | --- | --- | --- | --- | --- | --- |
| **Predictor variable** | **Outcome variable: Sleep disturbance** | | | |  | **Outcome variableDCS** | | | |  | **Outcome variable:NSSI** | | | |
| **B** | **SE** | **95% CI** | **P** |  | **B** | **SE** | **95% CI** | **P** |  | **B** | **SE** | **95% CI** | **P** |
| Sex | -0.638 | 0.511 | [-1.645,0.368] | 0.213 |  | -0.004 | 0.017 | [-0.037,0.029] | 0.805 |  | -0.188 | 0.207 | [-0.596,0.22] | 0.365 |
| Age | 1.071 | 0.536 | [0.017,2.125] | 0.046 |  | 0.026 | 0.018 | [-0.008,0.061] | 0.139 |  | -0.214 | 0.219 | [-0.645,0.216] | 0.328 |
| Years of education | -0.922 | 0.51 | [-1.926,0.081] | 0.071 |  | -0.026 | 0.017 | [-0.059,0.007] | 0.122 |  | 0.219 | 0.208 | [-0.191,0.628] | 0.294 |
| SDS | 0.045 | 0.046 | [-0.046,0.136] | 0.329 |  | 0.001 | 0.002 | [-0.001,0.004] | 0.329 |  | -0.008 | 0.019 | [-0.044,0.029] | 0.681 |
| Neuroticism | 0.031 | 0.007 | [0.016,0.046] | <0.001 |  | 0.001 | <.0001 | [0.0002,0.001] | 0.003 |  | 0.041 | 0.003 | [0.035,0.047] | <0.001 |
| PSQI |  |  |  |  |  | 0.008 | 0.002 | [0.004,0.012] | <0.001 |  | 0.076 | 0.024 | [0.029,0.124] | 0.002 |
| DCS |  |  |  |  |  |  |  |  |  |  | 2.793 | 0.722 | [1.372,4.214] | <0.001 |
| R2 | 0.098 | | | |  | 0.136 | | | |  | 0.553 | | | |
| F | 7.560** | | | |  | 8.925** | | | |  | 54.164** | | | |
| *Note: *P < 0.05, **P < 0.01. SDS = Self-Rating Depression Scale; NSSI = Non-Suicidal Self-Injury; PSQI = Pittsburgh Sleep Quality Index; DCS=diurnal cortisol slope* | | | | | | | | | | | | | | |
