# Supplementary material for: Neuroticism and Non-Suicidal Self-Injury: A Serial Mediation Model of Sleep Disturbance and Cortisol Dysregulation
Source: Research Square preprint supplement (doi:10.21203/rs.3.rs-8733092/v1), 2026-02-16
Supplement: Supplementary file 4 [file fc515034502adfe502cb8a40.docx]

| **Table 2** Regression Analyses of the CAR Mediation Model (Model 1) | | | | | | | | | | | | | | |
| --- | --- | --- | --- | --- | --- | --- | --- | --- | --- | --- | --- | --- | --- | --- |
| **Predictor variable** | **Outcome variable: Sleep disturbance** | | | |  | **Outcome variable: CAR** | | | |  | **Outcome variable:NSSI** | | | |
| **B** | **SE** | **95% CI** | **P** |  | **B** | **SE** | **95% CI** | **P** |  | **B** | **SE** | **95% CI** | **P** |
| Sex | -0.638 | 0.511 | [-1.645,0.368] | 0.213 |  | 3.635 | 4.96 | [-6.126,13.396] | 0.464 |  | -0.175 | 0.21 | [-0.588,0.238] | 0.405 |
| Age | 1.071 | 0.536 | [0.017,2.125] | 0.046 |  | -0.907 | 5.215 | [-11.172,9.357] | 0.862 |  | -0.148 | 0.22 | [-0.582,0.286] | 0.504 |
| Years of education | -0.922 | 0.51 | [-1.926,0.081] | 0.071 |  | -0.149 | 4.96 | [-9.91,9.611] | 0.976 |  | 0.145 | 0.21 | [-0.267,0.558] | 0.489 |
| SDS | 0.045 | 0.046 | [-0.046,0.136] | 0.329 |  | -0.537 | 0.446 | [-1.415,0.342] | 0.23 |  | -0.007 | 0.019 | [-0.044,0.03] | 0.703 |
| Neuroticism | 0.031 | 0.007 | [0.016,0.046] | <0.001 |  | -0.136 | 0.073 | [-0.28,0.009] | 0.066 |  | 0.042 | 0.003 | [0.036,0.049] | <0.001 |
| PSQI |  |  |  |  |  | -3.815 | 0.562 | [-4.922,-2.709] | <0.001 |  | 0.072 | 0.026 | [0.022,0.123] | 0.005 |
| CAR |  |  |  |  |  |  |  |  |  |  | -0.007 | 0.002 | [-0.012,-0.002] | 0.006 |
| R2 | 0.098 | | | |  | 0.213 | | | |  | 0.542 | | | |
| F | 7.560** | | | |  | 13.324** | | | |  | 51.850** | | | |
| *Note: *P < 0.05, **P < 0.01. SDS = Self-Rating Depression Scale; NSSI = Non-Suicidal Self-Injury; PSQI = Pittsburgh Sleep Quality Index;CAR = Cortisol Awakening Respons* | | | | | | | | | | | | | | |
