# Supplementary material for: Neuroticism and Non-Suicidal Self-Injury: A Serial Mediation Model of Sleep Disturbance and Cortisol Dysregulation
Source: Research Square preprint supplement (doi:10.21203/rs.3.rs-8733092/v1), 2026-02-16
Supplement: Supplementary file 5 [file fcc65af68593fe81cde7d9ee.docx]

| **Table 1** Descriptive Statistics and Spearman Correlations Among Key Study Variables | | | | | | | | | | | | |
| --- | --- | --- | --- | --- | --- | --- | --- | --- | --- | --- | --- | --- |
| **Variable** | **M** | **SD** | | **1** | **2** | **3** | **4** | **5** | **6** | **7** | **7** | **8** |
| 1.Sex |  |  | 1 | |  |  |  |  |  |  |  |  |
| 2.Age | 19.64 | 1.67 | -0.017 | | 1 |  |  |  |  |  |  |  |
| 3.Years of education | 14.19 | 1.75 | -0.019 | | 0.962** | 1 |  |  |  |  |  |  |
| 4.SDS | 54.78 | 6.44 | -0.130** | | 0.031 | 0.039 | 1 |  |  |  |  |  |
| 5.NSSI | 1.89 | 2.65 | -0.131** | | -0.025 | -0.005 | 0.432** | 1 |  |  |  |  |
| 6.Neuroticism | 79.7 | 40.37 | -0.138** | | -0.035 | -0.006 | 0.493** | 0.821** | 1 |  |  |  |
| 6.PSQI | 7.75 | 4.61 | -0.109** | | 0.047 | 0.029 | 0.174** | 0.332** | 0.285** | 1 |  |  |
| 7.CAR | 93.38 | 47.27 | 0.119** | | -0.053 | -0.048 | -0.233** | -0.345** | -0.273** | -0.436** | 1 |  |
| 8.DCS | -0.36 | 0.15 | -0.09 | | 0.008 | -0.01 | 0.213** | 0.389** | 0.294** | 0.296** | -0.750** | 1 |
| *Note: *P < 0.05, **P < 0.01. SDS = Self-Rating Depression Scale; NSSI = Non-Suicidal Self-Injury; PSQI = Pittsburgh Sleep Quality Index;CAR = Cortisol Awakening Response;DCS=diurnal cortisol slope* | | | | | | | | | | | | |
